# Supplementary material
Source: ML conference proceedings conference paper supplement (https://openreview.net/forum?id=eNjIsrbSez)

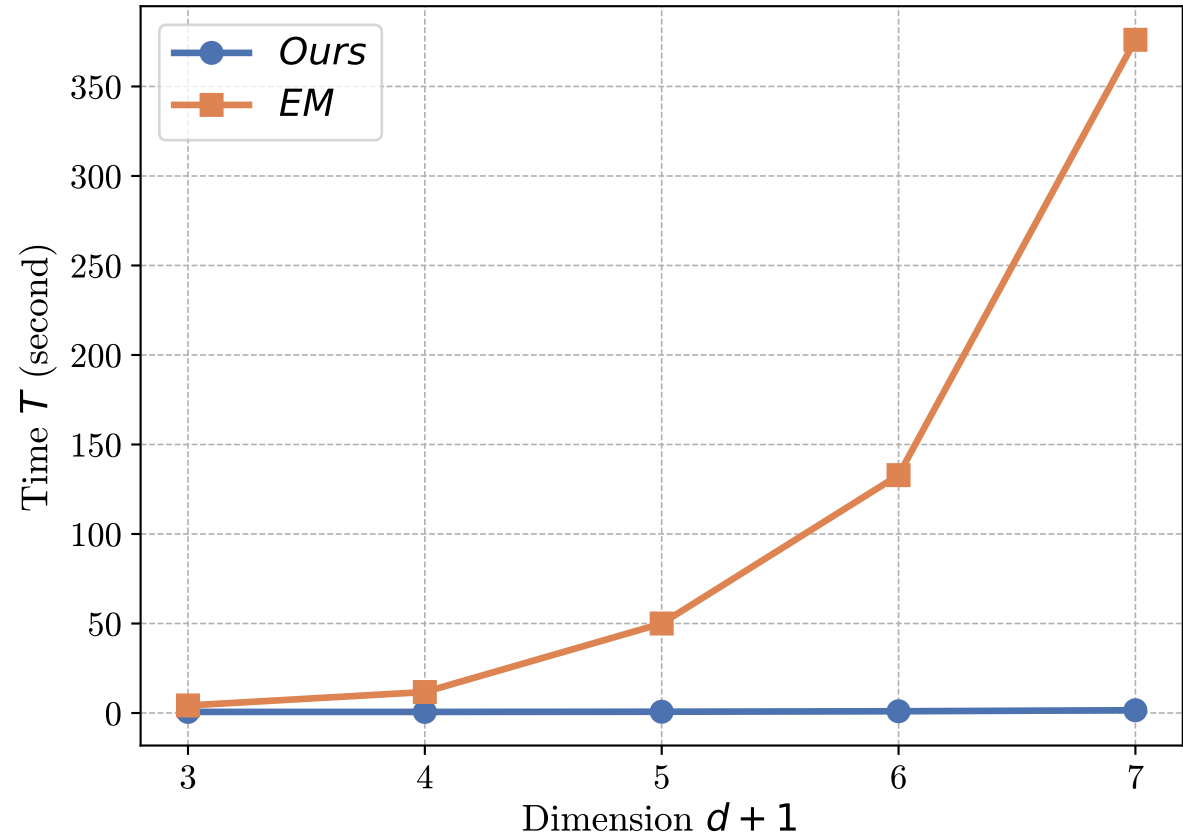

Supplement: supplementary_material [file Runtime_per_dimensions.pdf › FeatHawkes_ICLR/notebooks/paper_ICLR/png_papers/Runtime_per_dimensions.pdf]

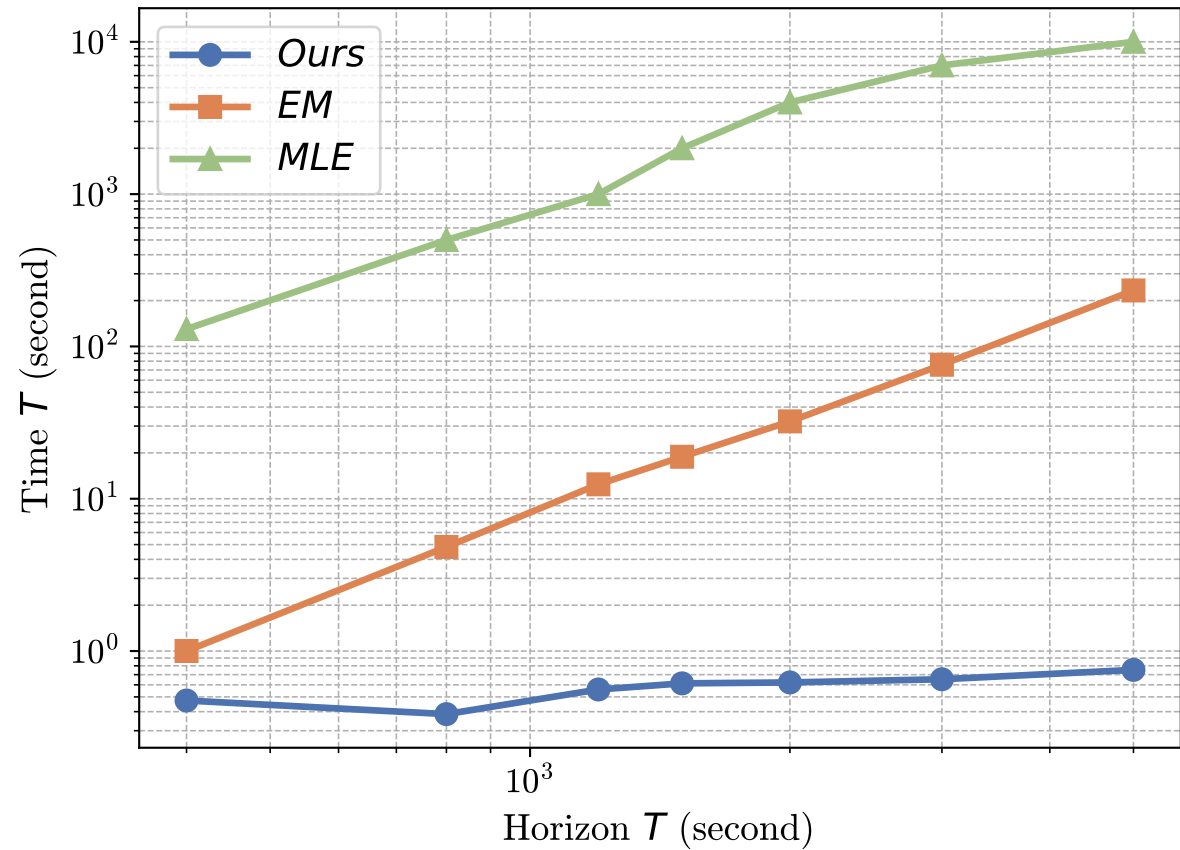

Supplement: supplementary_material [file Runtime_without_features.pdf › FeatHawkes_ICLR/notebooks/paper_ICLR/png_papers/Runtime_without_features.pdf]

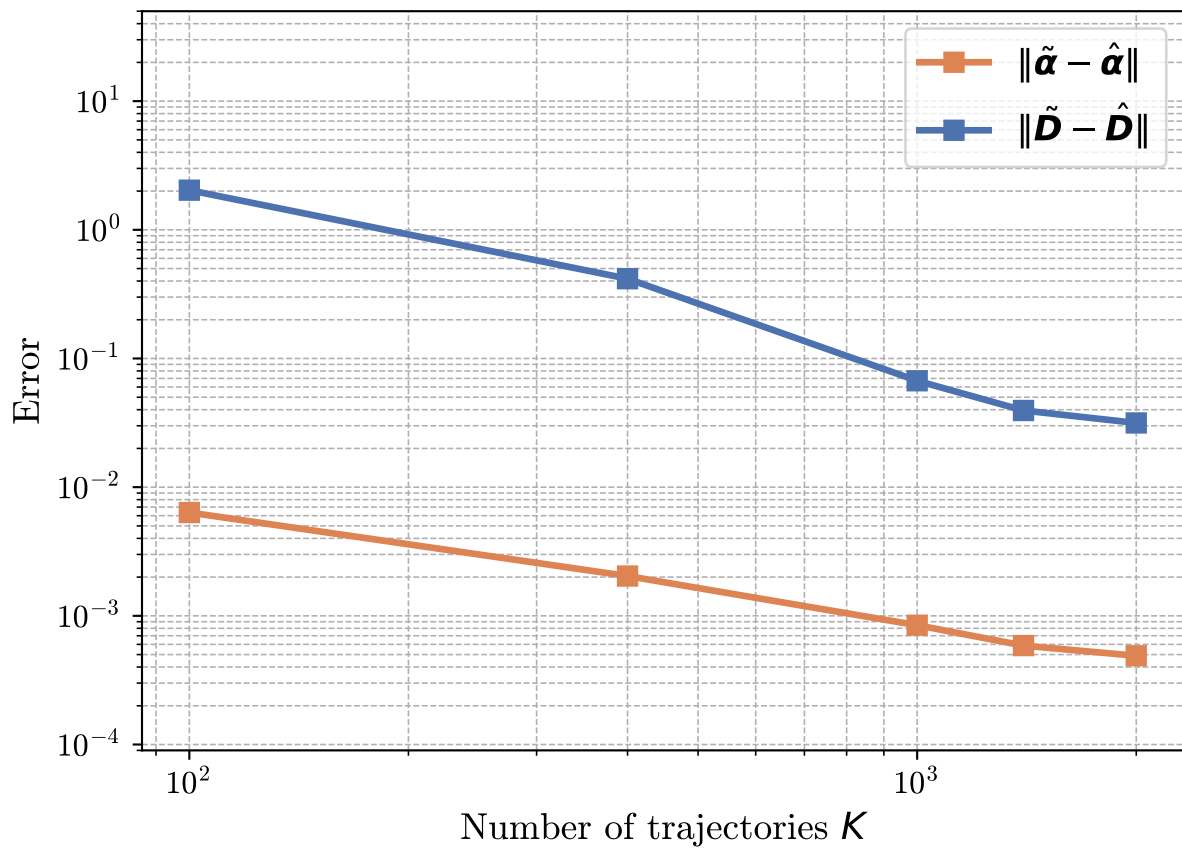

Supplement: supplementary_material [file alphas_and_D_errors.pdf › FeatHawkes_ICLR/notebooks/paper_ICLR/png_papers/alphas_and_D_errors.pdf]

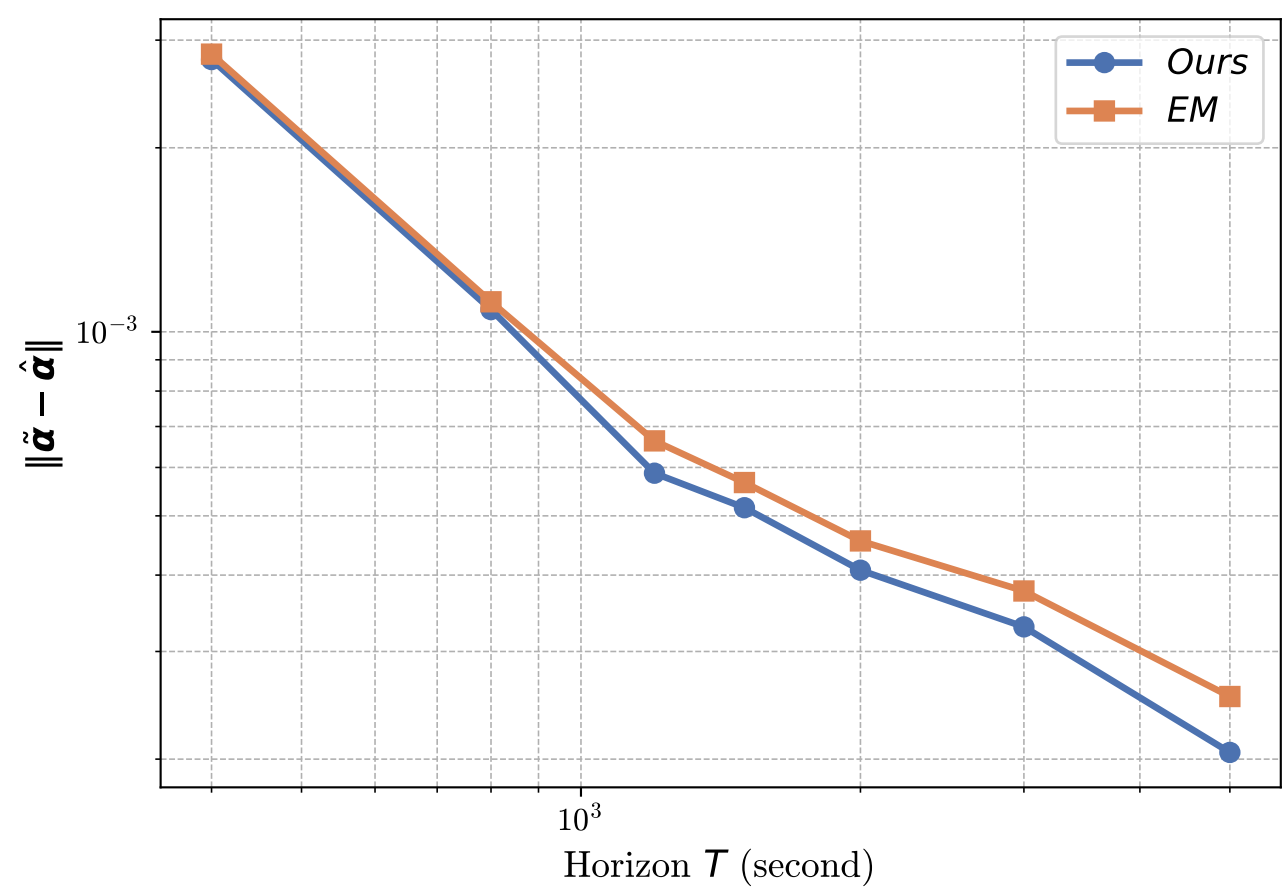

Supplement: supplementary_material [file convergence_withoutfeatureonedimension.pdf › FeatHawkes_ICLR/notebooks/paper_ICLR/png_papers/convergence_withoutfeatureonedimension.pdf]

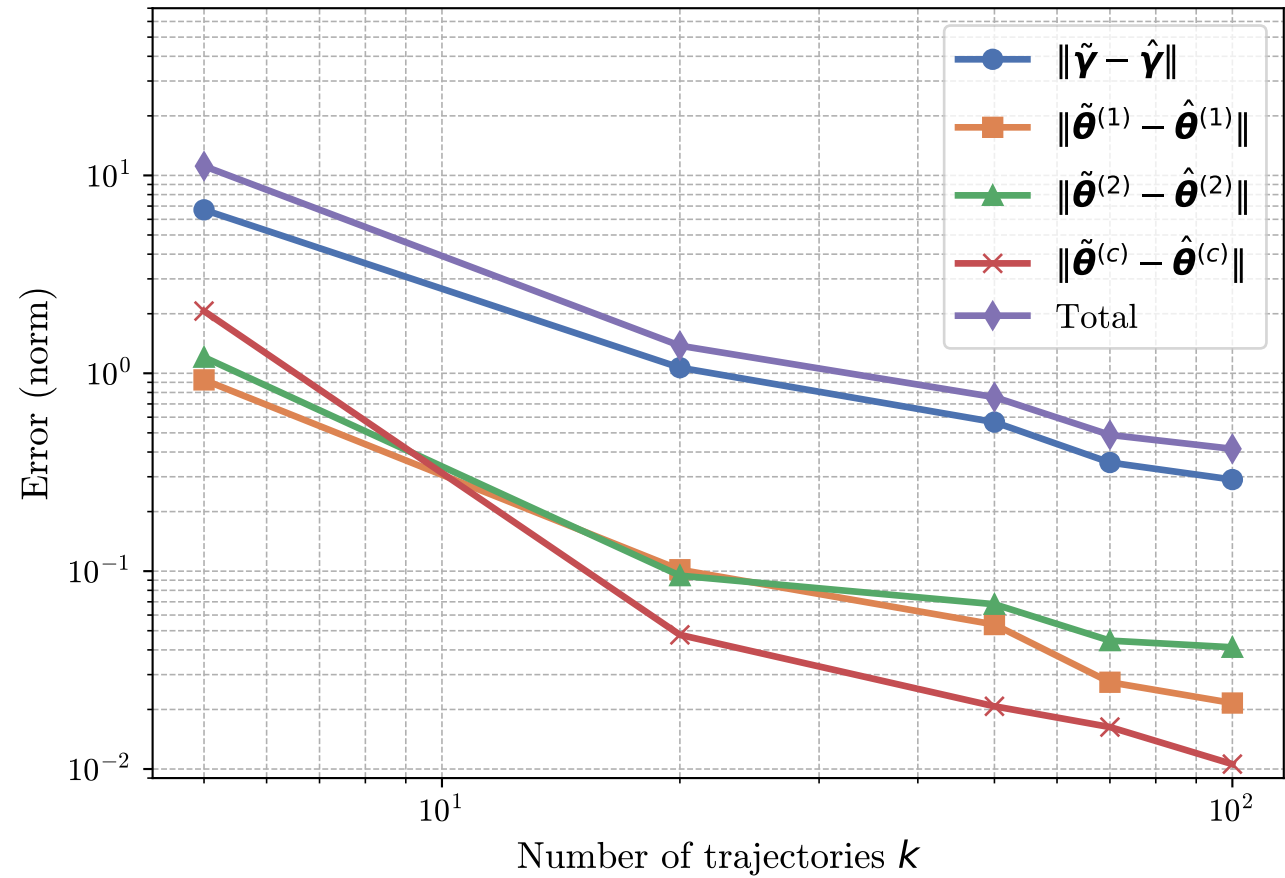

Supplement: supplementary_material [file errors_with_features.pdf › FeatHawkes_ICLR/notebooks/paper_ICLR/png_papers/errors_with_features.pdf]
